# Supplementary material for: Quantifying particle-to-particle heterogeneity in aerosol hygroscopicity
Source: Copernicus journal article supplement (doi:10.5194/acp-23-3195-2023), 2023-03-10
Supplement: Supplementary file 1 [file acp-23-3195-2023-supplement.pdf]

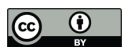

*Supplement of*

## **Quantifying particle-to-particle heterogeneity in aerosol hygroscopicity**

**Liang Yuan and Chunsheng Zhao**

*Correspondence to:* Chunsheng Zhao (zcs@pku.edu.cn)

The copyright of individual parts of the supplement might differ from the article licence.

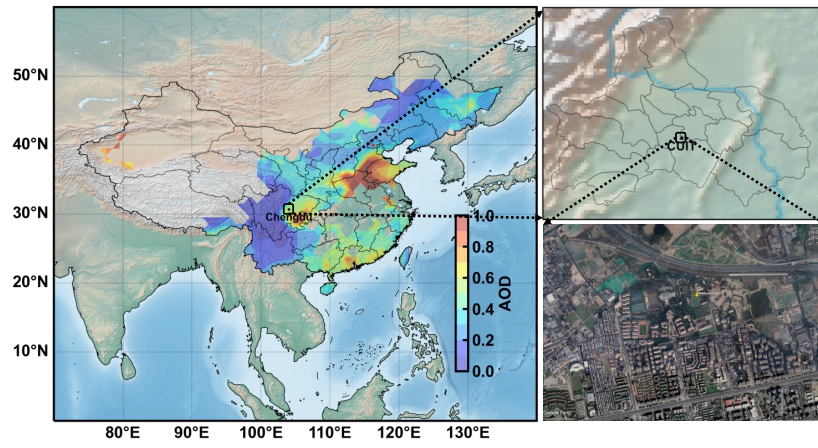

**Figure S1.** Location of the observation site. The contour represents the average AOD in January 2019.

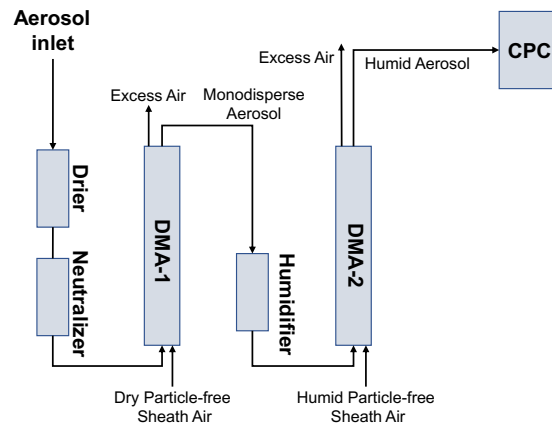

**Figure S2.** Schematic structure of the H-TDMA

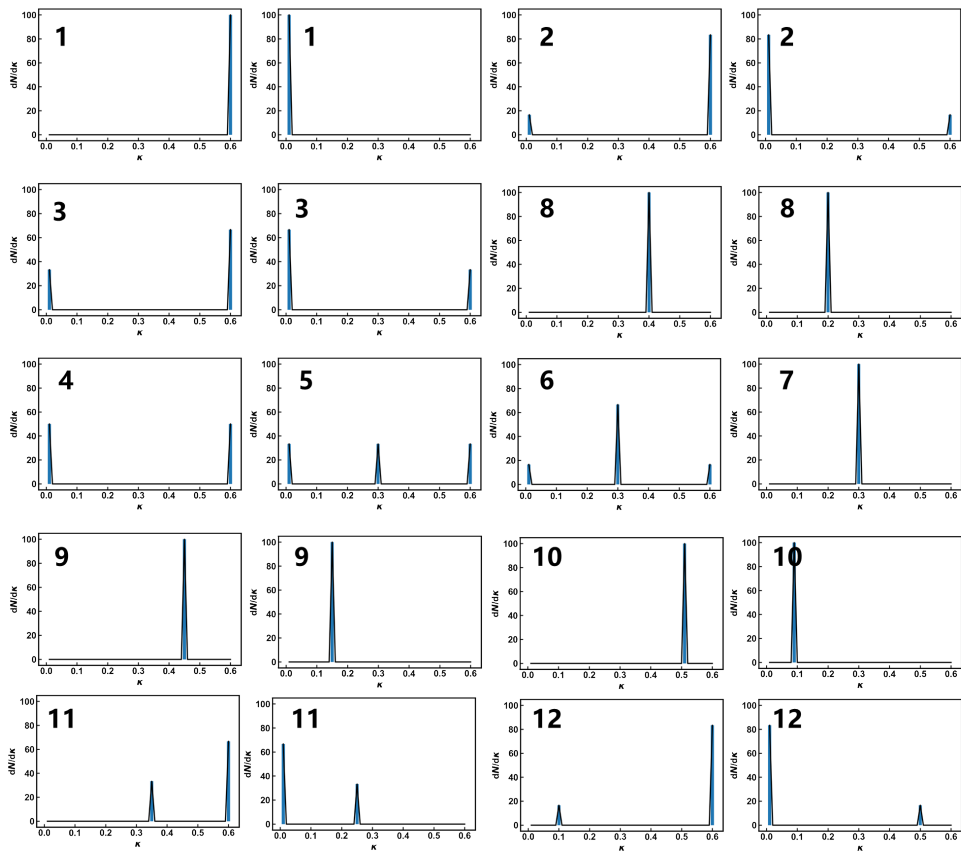

Figure S3.  $\kappa$ -PDFs for the 12 populations in the diagram for the particle-to-particle heterogeneity in aerosol hygroscopicity.
